# Supplementary material for: The SOX17/miR-371-5p/SOX2 axis inhibits EMT, stem cell properties and metastasis in colorectal cancer
Source: PubMed Central journal article supplement (PMC4496205; doi:10.18632/oncotarget.3603), 2015-03-15
Supplement: oncotarget-06-9099-s001.pdf [file oncotarget-06-9099-s001.pdf]

## The SOX17/miR-371-5p/SOX2 axis inhibits EMT, stem cell properties and metastasis in colorectal cancer

### Supplementary Material

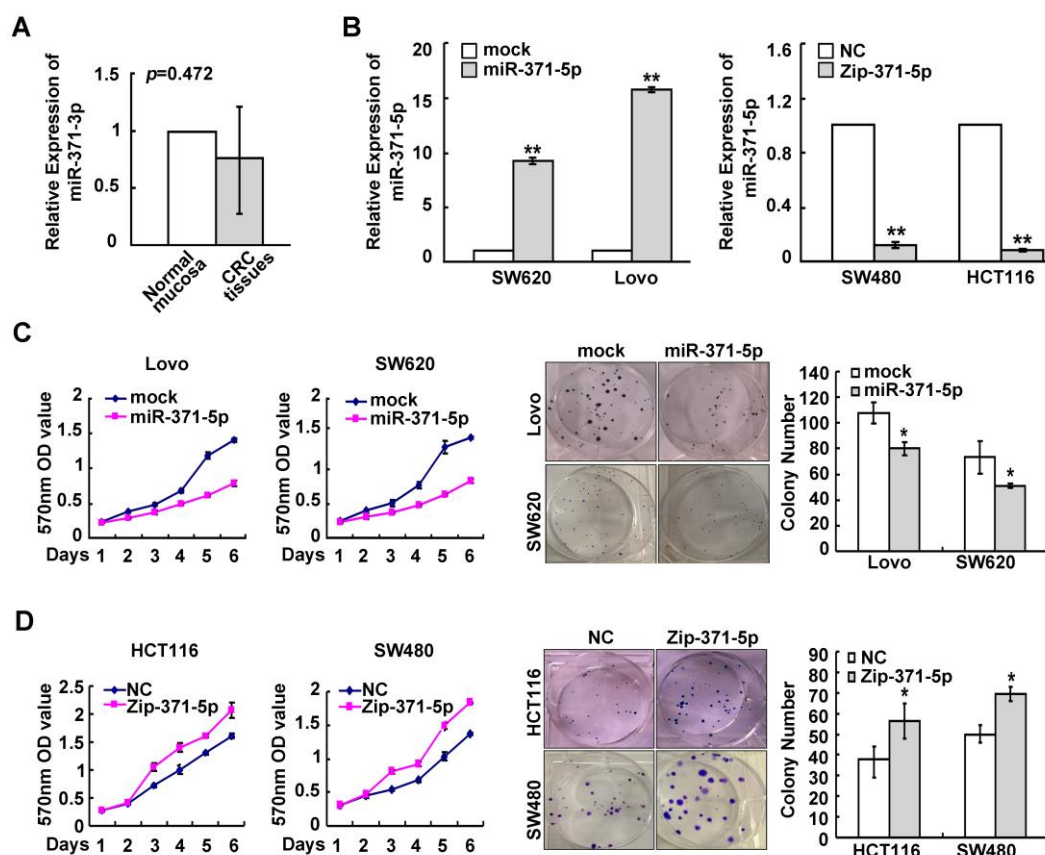

**Supplementary Figure 1: miR-371-5p suppresses proliferation of CRC cells.** (A) miR-371-3p expression in 100 cases of primary CRC tissues and matched adjacent normal mucosa by qRT-PCR. The relative expression levels of miR-371-3p in normal mucosa were normalized to 1. (B) miR-371-5p expression in cells transduced lentiviral vector expressing miR-371-5p or repressing miR-371-5p by qRT-PCR. The relative expression levels of miR-371-5p in mock or NC cells were normalized to 1. (C-D) Effect of miR-371-5p ectopic expression (C) or knockdown (D) on the proliferation of CRC cells by MTT assay and colony formation assay. \*  $P < 0.05$ , \*\*  $P < 0.01$ . Data represent the mean  $\pm$  SD.

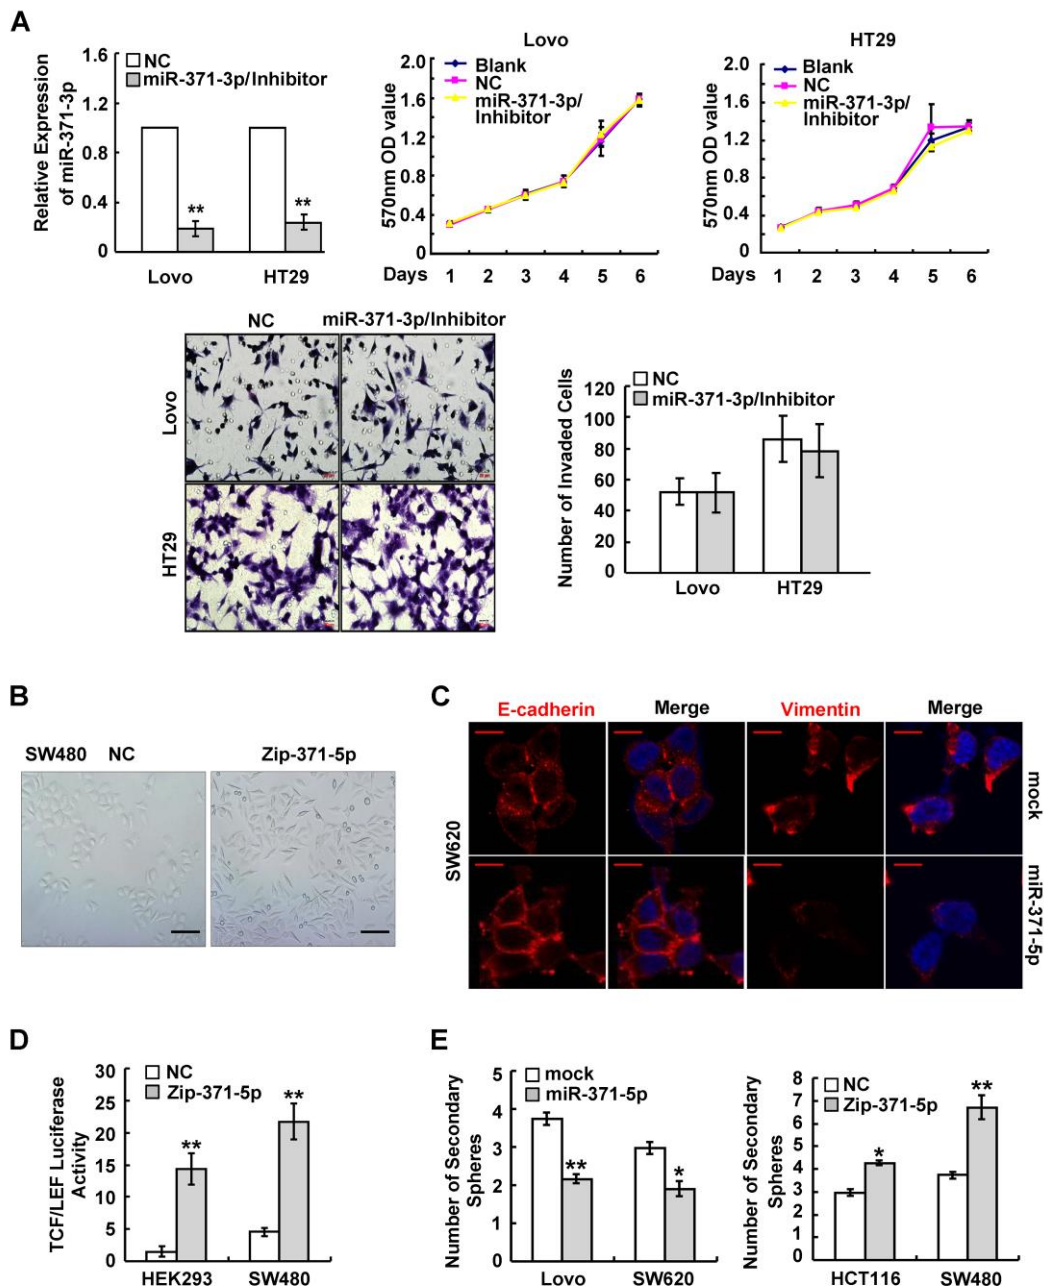

**Supplementary Figure 2: miR-371-5p suppresses EMT and stem cell properties in CRC.** (A) Effect of miR-371-3p inhibitor on the proliferation and invasiveness of CRC cells by MTT assay or Boyden chamber. Scale bars represent 20  $\mu\text{m}$ . (B) Representative images of morphological change in miR-371-5p depleting cells. Scale bars represent 50  $\mu\text{m}$ . (C) Immunofluorescence images of E-cadherin, Vimentin expression in miR-371-5p over-expressing cells. Red scale bars represent 10  $\mu\text{m}$ . (D)

Luciferase activities of TCF/LEF transcription in HEK293 and SW480 cells treated with Zip-371-5p. (E) The number of secondary spheres from miR-371-5p over-expressing or depleting cells. \*  $P < 0.05$ , \*\*  $P < 0.01$ . Data represent the mean  $\pm$  SD.

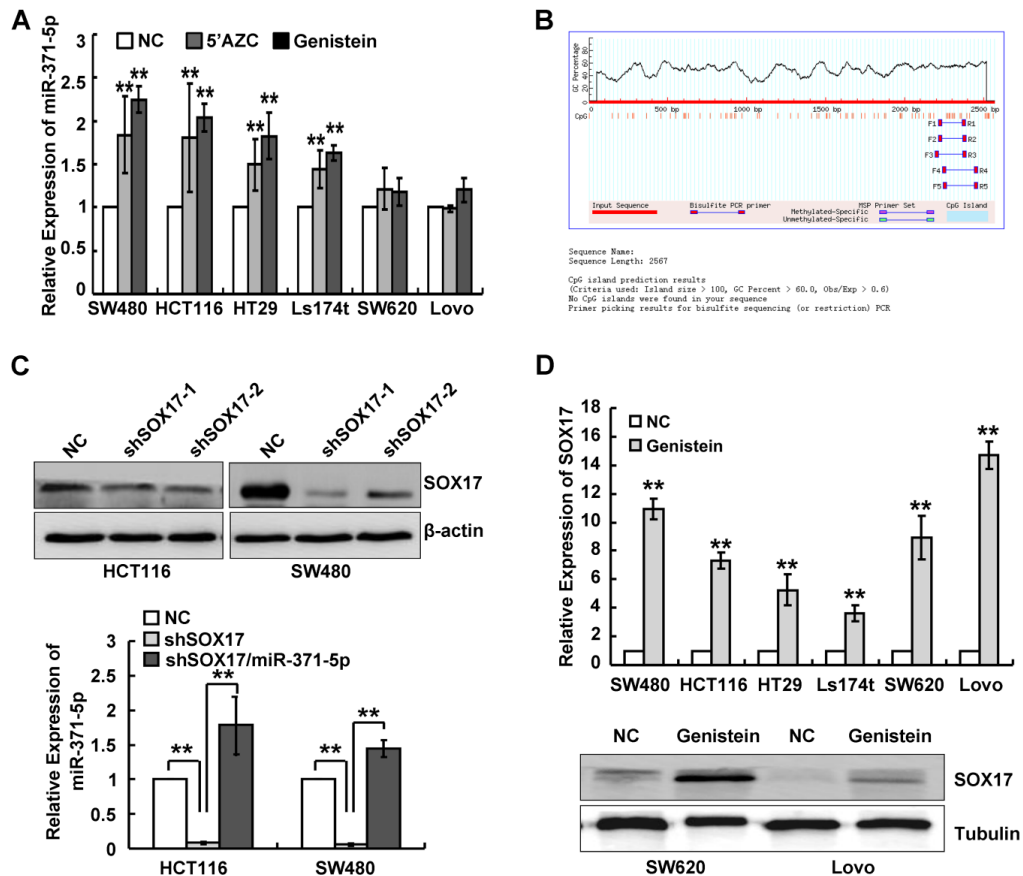

**Supplementary Figure 3: Down-regulation of SOX17 is associated with promoter methylation.** (A) miR-371-5p expression in 6 CRC cell lines treated with methyltransferase inhibitor 5'AZC or Genistein by qRT-PCR. The relative expression levels of miR-371-5p in CRC cells without treatment were normalized to 1. (B) Bioinformatic analysis of miR-371-5p promoter by Methyprimer software. (C) SOX17 expression in HCT116 and SW480 cells treated with shSOX17-1 or shSOX17-2 by Western blot. MiR-371-5p expression in HCT116 and SW480 cells

treated with shSOX17 or shSOX17/miR-371-5p by qRT-PCR. Protein expression levels were normalized to  $\beta$ -actin, while mRNA expression levels of miR-371-5p in NC cells were normalized to 1. (D) SOX17 expression in CRC cells treated with methyltransferase inhibitor Genistein by qRT-PCR or Western blot. mRNA expression levels of SOX17 in NC cells were normalized to 1, while protein expression levels were normalized to Tubulin. \*  $P < 0.05$ , \*\*  $P < 0.01$ . Data represent the mean  $\pm$  SD.

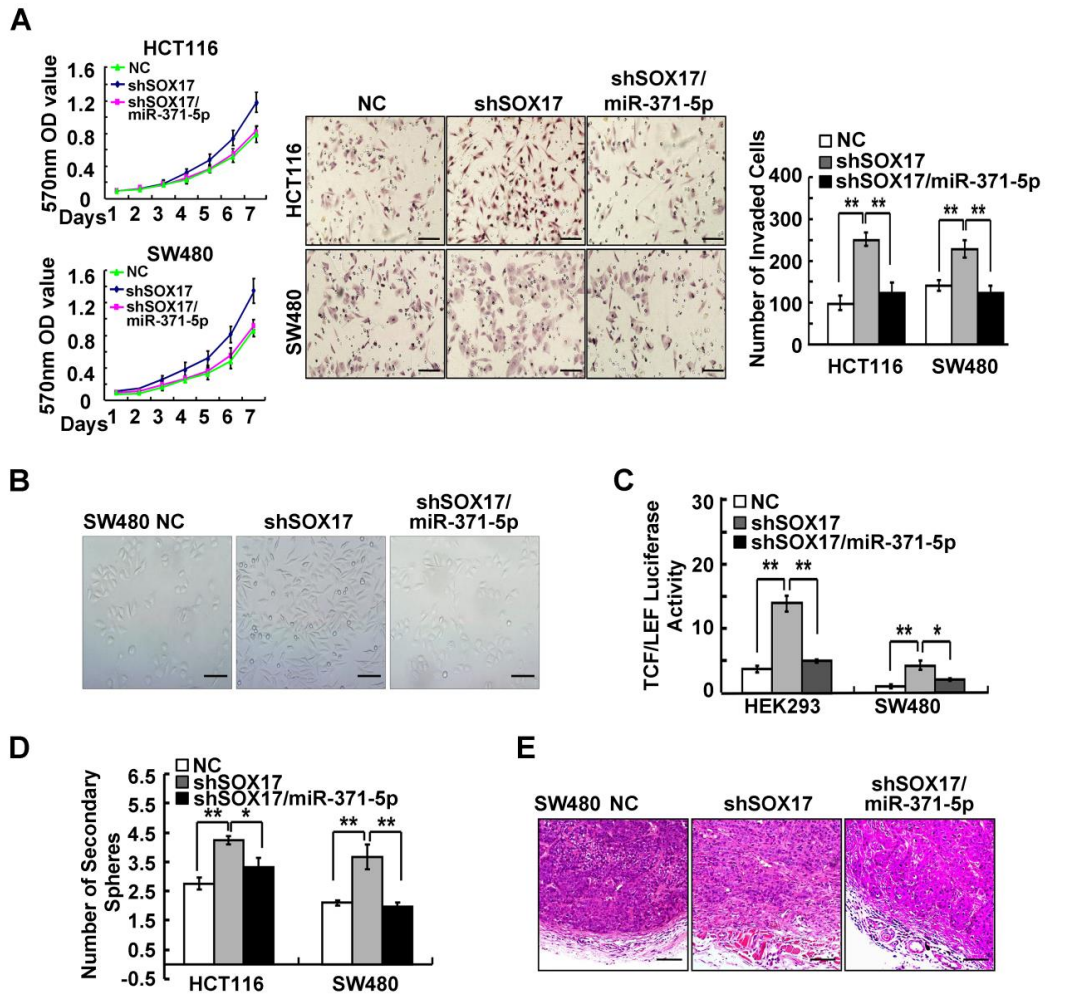

**Supplementary Figure 4: SOX17 is sufficient to suppress cell proliferation, invasion, EMT and stem cell properties by targeting miR-371-5p in CRC.** (A) Effects of shSOX17 and shSOX17/miR-371-5p on cell proliferation and invasiveness by MTT assay or Boyden chamber. Scale bars represent 50  $\mu$ m. (B) Representative images of morphological change in SW480 cells treated with shSOX17 or shSOX17/miR-371-5p. Scale bars represent 50  $\mu$ m. (C) Luciferase activities of TCF/LEF transcription in HEK293 and SW480 cells treated with shSOX17 or shSOX17/miR-371-5p. (D) The number of secondary spheres from cells treated with shSOX17 or shSOX17/miR-371-5p. (E) SW480/NC and SW480/shSOX17 and SW480/shSOX17/miR-371-5p cells ( $1 \times 10^6$ ) were injected in the subcutaneous tissue

of nude mice (n = 5). Local invasion of subcutaneous tumors by HE staining. Scale bars represent 50  $\mu\text{m}$ . \* P < 0.05, \*\* P < 0.01. Data represent the mean  $\pm$  SD.

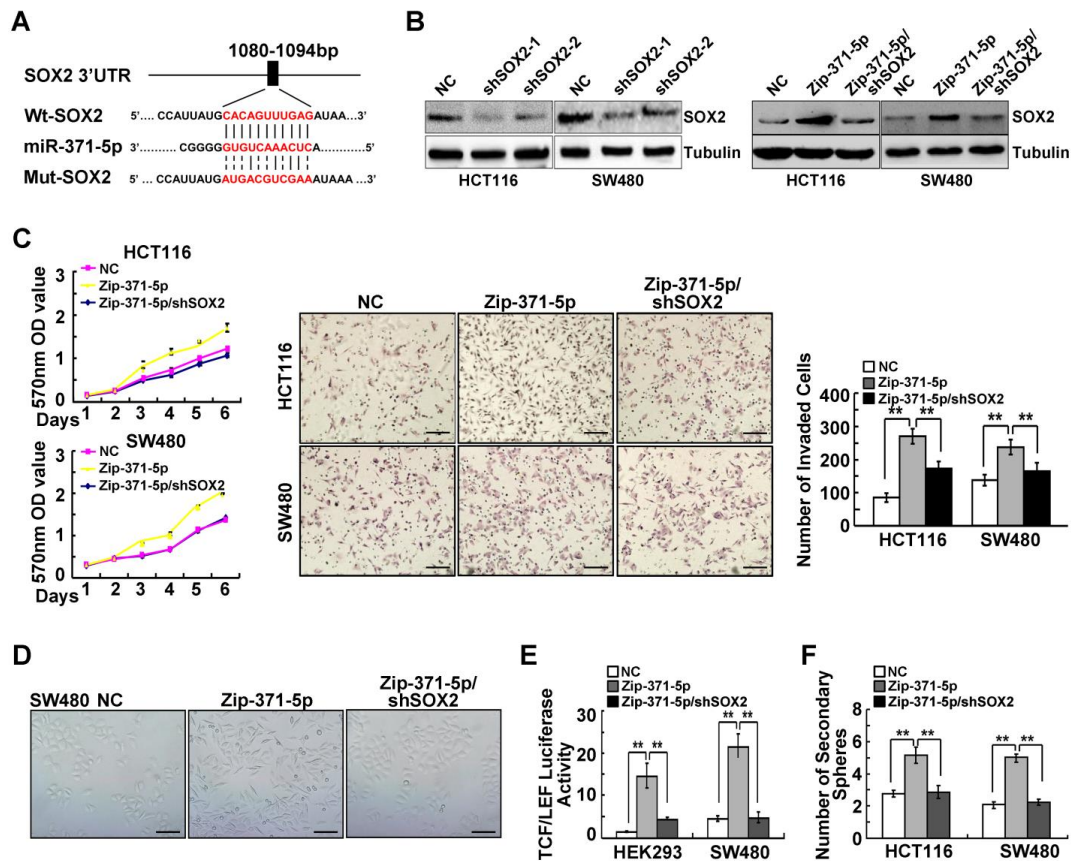

**Supplementary Figure 5: miR-371-5p suppresses cell proliferation, invasion, EMT and stem cell properties by targeting SOX2 in CRC.** (A) The sequence of mutated binding site of miR-371-5p in the SOX2 3'UTR. (B) SOX2 expression in HCT116 and SW480 cells treated with shSOX2-1, shSOX2-2, Zip-371-5p or Zip-371-5p/shSOX2 by Western blot. Expression levels were normalized to Tubulin. (C) Effects of Zip-371-5p and Zip-371-5p/shSOX2 on cell proliferation and invasiveness by MTT assay or Boyden chamber. Scale bars represent 100  $\mu\text{m}$ . (D) Representative

images of morphological change in SW480/NC, SW480/Zip-371-5p and SW480/Zip-371-5p/shSOX2 cells. Scale bars represent 50  $\mu\text{m}$ . (E) Luciferase activities of TCF/LEF transcription in HEK293 and SW480 cells treated with Zip-371-5p or Zip-371-5p/shSOX2. (F) The number of secondary spheres from cells treated with Zip-371-5p or Zip-371-5p/shSOX2. \*  $P < 0.05$ , \*\*  $P < 0.01$ . Data represent the mean  $\pm$  SD.

**Supplementary Table 1: Relationship between miR-371-5p expression and clinicopathologic features of CRC patients.**

| Features                           | Number | $2^{-\Delta\Delta Ct}$ (mean±SD) | F/t             | <i>p</i>              |
|------------------------------------|--------|----------------------------------|-----------------|-----------------------|
| <b>All case</b>                    | 100    |                                  |                 |                       |
| <b>Age (years) <sup>a</sup></b>    |        |                                  |                 |                       |
| <50                                | 28     | 0.268±0.206                      | t=-1.324        | <i>p</i> =0.189       |
| ≥50                                | 72     | 0.345±0.161                      |                 |                       |
| <b>Gender</b>                      |        |                                  |                 |                       |
| Male                               | 55     | 0.361±0.208                      | t=0.558         | <i>p</i> =0.557       |
| Female                             | 44     | 0.302±0.132                      |                 |                       |
| <b>Position</b>                    |        |                                  |                 |                       |
| Colon                              | 47     | 0.342±0.197                      | t=0.622         | <i>p</i> =0.535       |
| Rectal                             | 53     | 0.304±0.155                      |                 |                       |
| <b>Differentiation</b>             |        |                                  |                 |                       |
| Well                               | 19     | 0.372±0.270                      | <b>F=5.780</b>  | <b><i>p</i>=0.004</b> |
| Moderate                           | 57     | 0.338±0.158                      |                 |                       |
| Poor                               | 24     | 0.239±0.080                      |                 |                       |
| <b>Infiltration Depth</b>          |        |                                  |                 |                       |
| Muscular layer                     | 18     | 0.409±0.375                      | F=1.996         | <i>p</i> =0.141       |
| Full-thickness                     | 55     | 0.299±0.104                      |                 |                       |
| Serosa                             | 27     | 0.307±0.226                      |                 |                       |
| <b>Tumor Size (cm)<sup>b</sup></b> |        |                                  |                 |                       |
| <5cm                               | 57     | 0.393±0.268                      | <b>t=-2.814</b> | <b><i>p</i>=0.006</b> |
| ≥5cm                               | 43     | 0.216±0.103                      |                 |                       |
| <b>Lymphatic Metastasis</b>        |        |                                  |                 |                       |
| N                                  | 36     | 0.464±0.151                      | <b>t=2.260</b>  | <b><i>p</i>=0.037</b> |
| Y                                  | 64     | 0.285±0.219                      |                 |                       |
| <b>Liver Metastasis</b>            |        |                                  |                 |                       |
| N                                  | 85     | 0.347±0.252                      | <b>t=2.098</b>  | <b><i>p</i>=0.043</b> |
| Y                                  | 15     | 0.184±0.122                      |                 |                       |



<sup>a</sup> Age was grouped according to established rules.

<sup>b</sup> Tumor size was grouped according to median.

**Supplementary Table 2: Primer sequences for Quantitative Real-Time PCR.**

| <b>Gene</b> | <b>Primers</b> | <b>Sequence(5'-3')</b>  |
|-------------|----------------|-------------------------|
| SOX2        | Forward        | TACAGCATGTCCTACTCGCAG   |
|             | Reverse        | GAGGAAGAGGTAACCACAGGG   |
| OCT4        | Forward        | GTGTTTCAGCCAAAAGACCATCT |
|             | Reverse        | GGCCTGCATGAGGGTTTCT     |
| SOX17       | Forward        | GTGGACCGCACGGAATTTG     |
|             | Reverse        | GGAGATTCACACCGGAGTCA    |
| CD133       | Forward        | AGTCGGAAACTGGCAGATAGC   |
|             | Reverse        | GGTAGTGTTGTACTGGGCCAAT  |
| GAPDH       | Forward        | TGTGGGCATCAATGGATTTGG   |
|             | Reverse        | ACACCATGTATTCCGGGTCAAT  |

**Supplementary Table 3: Primer sequences for PCR amplification.**

| <b>Gene</b>         | <b>Primers</b> | <b>Sequence(5'-3')</b>                 |
|---------------------|----------------|----------------------------------------|
| BTG3-3'UTR Wt       | Forward        | AAAAC TCGAGTCGTTTTTGATTGTGTTGGTGTC     |
|                     | Reverse        | AAAAGCGGCCGCTGCCTCAAAC TGTTTTTTATTTGCA |
| SOX2-3'UTR Wt       | Forward        | AATACTCGAGAGCATGGAGAAAACCCGGTA         |
|                     | Reverse        | TAAAGCGGCCGCAATTTATTTATCTCAAAC TGTGCA  |
| SOCS5-3'UTR Wt      | Forward        | AAAAC TCGAGCAATAGCGGATAGAGCTACAGGT     |
|                     | Reverse        | AAAAGCGGCCGCTAGTTGACAGGCTACAATGGGA     |
| SOX2-3'UTR Mut      | Forward        | ATGACGTCGAAATAAATAAATAAATT             |
|                     | Reverse        | CATAATGGAGTAAAAACTTAAGTTGA             |
| SOX17-CDS           | Forward        | GCGGTAGGCGTGTACGGT                     |
|                     | Reverse        | CCGGACACGCTGAACTTGT                    |
| miR-371-5p Promoter | Forward        | AATTGGTACCGTGGGCTCTCACCTATATAAGAAC     |
|                     | Reverse        | TAGACTCGAGGACATCAGAATAGTGCTCCACATTT    |
| R1(-996— -654)      | Forward        | GAGTGGATGACTGGTGGAATG                  |
|                     | Reverse        | TCACAGAGGCCAATGATACG                   |
| R2 (-777— -361)     | Forward        | GGAAGGGGTGGGCTTTAA                     |
|                     | Reverse        | TCGGAAGGCTACGGTGGTA                    |
| R3 (-376— -86)      | Forward        | CACCGTAGCCTTCCGAGTA                    |
|                     | Reverse        | GCCCTTGATGAGCTGTTGA                    |
